# Supplementary material for: Anharmonic rattling leading to ultra-low lattice thermal conductivity in Cu12Sb4S13 tetrahedrites
Source: Royal Society of Chemistry journal article supplement (doi:10.1039/d4ta03316g), 2024-01-01
Supplement: d4ta03316g1.pdf [file d4ta03316g1.pdf]

## Supporting Information

### Anharmonic rattling leading ultra-low lattice thermal conductivity in

### $\text{Cu}_{12}\text{Sb}_4\text{S}_{13}$ tetrahedrites

Kewal Singh Rana,<sup>a</sup> Nidhi,<sup>b</sup> Chandan Bera,<sup>b</sup> Kanishka Biswas,<sup>c</sup> and Ajay Soni<sup>a\*</sup>

<sup>a</sup>School of Physical Sciences, Indian Institute of Technology Mandi, Mandi 175075, Himachal Pradesh, India

<sup>b</sup>Institute of Nano Science and Technology, Knowledge City, Sahibzada Ajit Singh Nagar, 140306 Punjab, India

<sup>c</sup>New Chemistry Unit, School of Advanced Materials and International Centre of Materials Science, Jawaharlal  
Nehru Centre for Advanced Scientific Research (JNCASR), Jakkur, Bangalore 560064, India

Corresponding Author Email: [ajay@iitmandi.ac.in](mailto:ajay@iitmandi.ac.in)

The Supporting Information includes structural, phonon dispersion relations, eigen vector visualizations, electrical, thermal and Raman spectroscopic measurements.

#### S1: Sound Velocity Measurement Details:

The mean sound velocity ( $v_m$ ) was estimated from the longitudinal ( $v_l$ ) and transverse ( $v_t$ ) sound velocities via the formula:

$$v_m = \left( \frac{3}{v_l^{-3} + 2v_t^{-3}} \right)^{1/3} \dots\dots\dots (1)$$

The Grüneisen parameter ( $\gamma_G$ ) was estimated using the formula:

$$\gamma_G = \frac{3}{2} \left( \frac{1 + \nu_p}{2 - 3\nu_p} \right) \dots\dots\dots (2)$$

Where,  $\nu_p$  is the Poisson ratio which is calculated from  $v_l$  and  $v_t$  through:

$$v_p = \frac{1 - 2\left(\frac{v_t}{v_l}\right)^2}{2 - 2\left(\frac{v_t}{v_l}\right)^2}, \dots\dots\dots (3)$$

The Debye temperature ( $\theta_D$ ) was calculated from the mean sound velocity ( $v_m$ ) using:

$$\theta_D = \frac{h}{k_B} \left( \frac{3N}{4\pi V_u} \right)^{1/3} v_m, \dots\dots\dots (4)$$

where  $h$ ,  $N$  and  $V_u$  are the Planck's constant, number of atoms in a unit cell and unit-cell volume.<sup>1</sup>

Further, the bulk ( $B$ ) and shear modulus ( $G$ ) were determined using the  $v_l$ ,  $v_t$  and density ( $\rho$ ) of the material using the equation:

$$B = v_l^2 \rho - \frac{4}{3}(v_t^2 \rho), \dots\dots\dots (5)$$

$$G = v_t^2 \rho. \dots\dots\dots (6)$$

**S2: Lorenz number Calculations:**

The Lorenz number ( $L$ ) is calculated by fitting the reduced chemical potential ( $\eta$ ), which is derived from the temperature dependent Seebeck coefficient, single parabolic band and acoustic phonon scattering,<sup>2</sup> via:

$$S = \frac{k_B}{e} \left( \frac{2F_1(\eta)}{F_0(\eta)} - \eta \right) \dots\dots\dots (8)$$

and 
$$L = \left( \frac{k_B}{e} \right)^2 \frac{3F_0(\eta)F_2(\eta) - 4F_1^2(\eta)}{F_0^2(\eta)} \dots\dots\dots (9)$$

Here,  $\eta = \left( \frac{E_F}{k_B T} \right)$ , in which  $k_B$  being the Boltzmann's constant and the Fermi integral,  $F_n(\eta)$

is denoted by: 
$$F_n(\eta) = \int_0^\infty \frac{\epsilon^n}{1 + e^{\epsilon - \eta}} \dots \dots \dots (11)$$

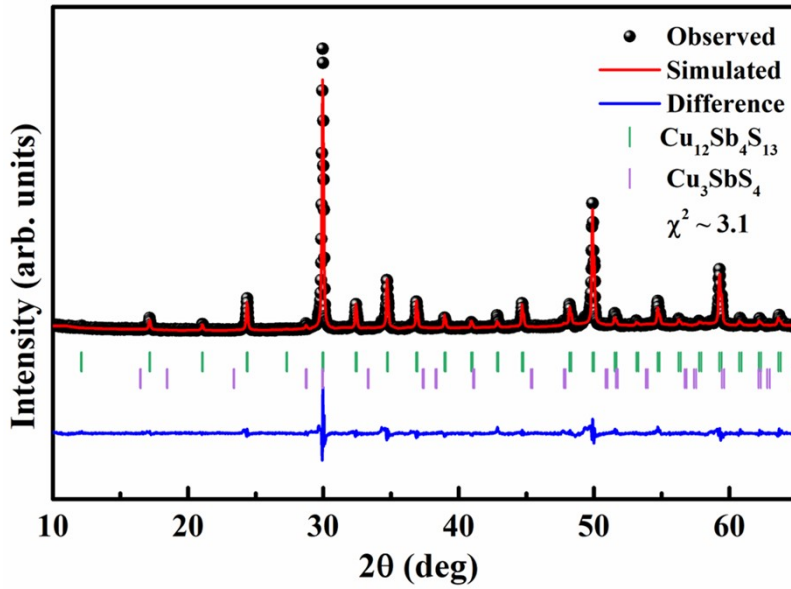

Fig. S1 Rietveld refined XRD pattern of  $\text{Cu}_{12}\text{Sb}_4\text{S}_{13}$  using Fullprof Suite software.

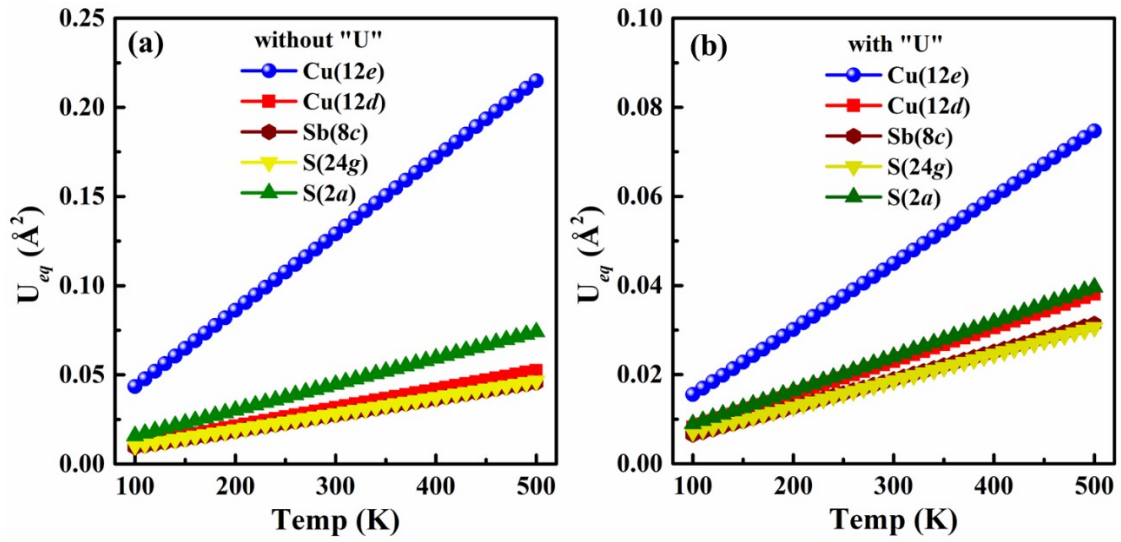

Fig. S2 The Cu(12e) atoms exhibit a large atomic displacement parameter (ADP:  $U_{eq}$ ), with temperatures, in comparison with other atoms (Sb, S) and Cu(12d), for (a) without U (Coulombic interaction term) and (b) with U.

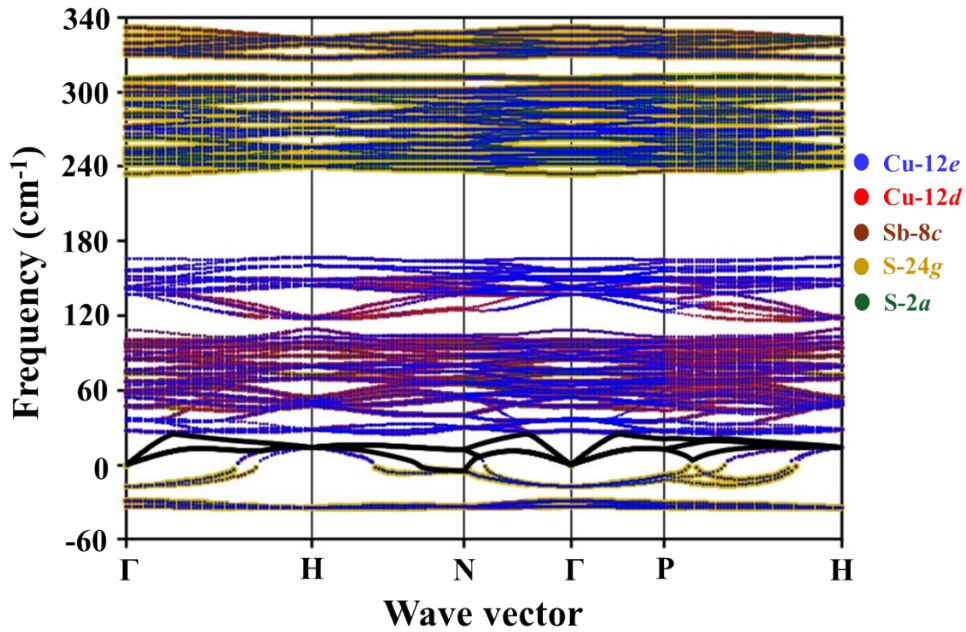

Fig. S3 The atom-projected phonon dispersion relation without  $U$  (Coulombic interaction term) for  $\text{Cu}_{12}\text{Sb}_4\text{S}_{13}$ .

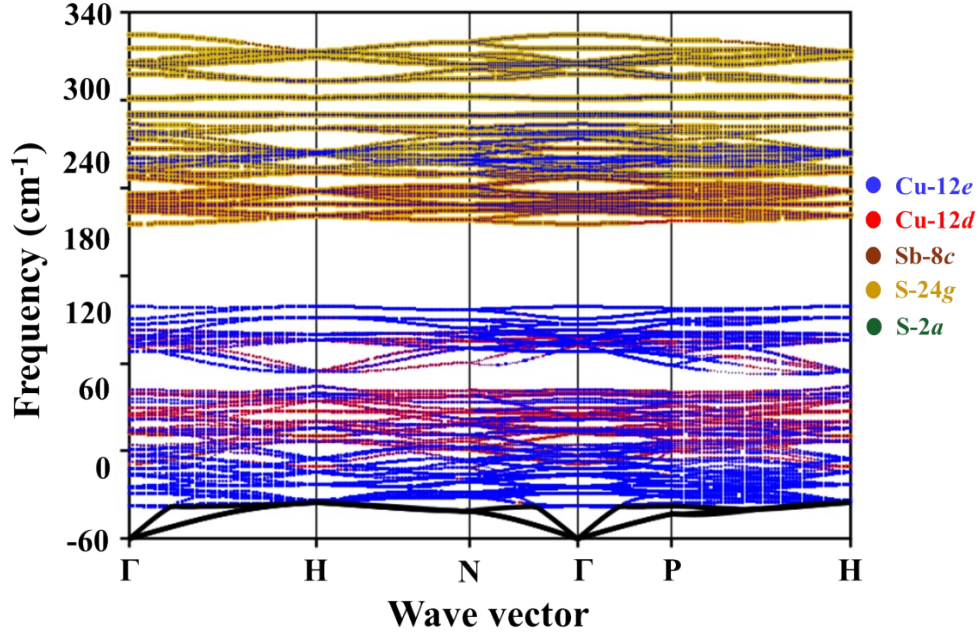

Fig. S4 The atom-projected phonon dispersion relation with  $U$  (Coulombic interaction term) for  $\text{Cu}_{12}\text{Sb}_4\text{S}_{13}$ .

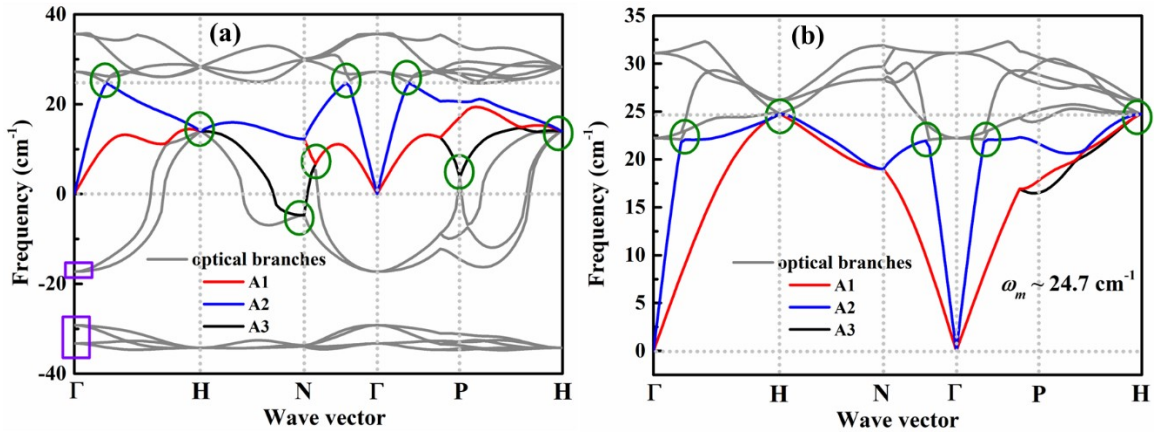

Fig. S5 The low energy acoustic and optical phonon interactions shown in green circle (a) without  $U$  parameter, and the purple rectangular box at  $\Gamma$ -point represents the negative modes frequencies, (b) with  $U$  parameter, for  $\text{Cu}_{12}\text{Sb}_4\text{S}_{13}$ , respectively.

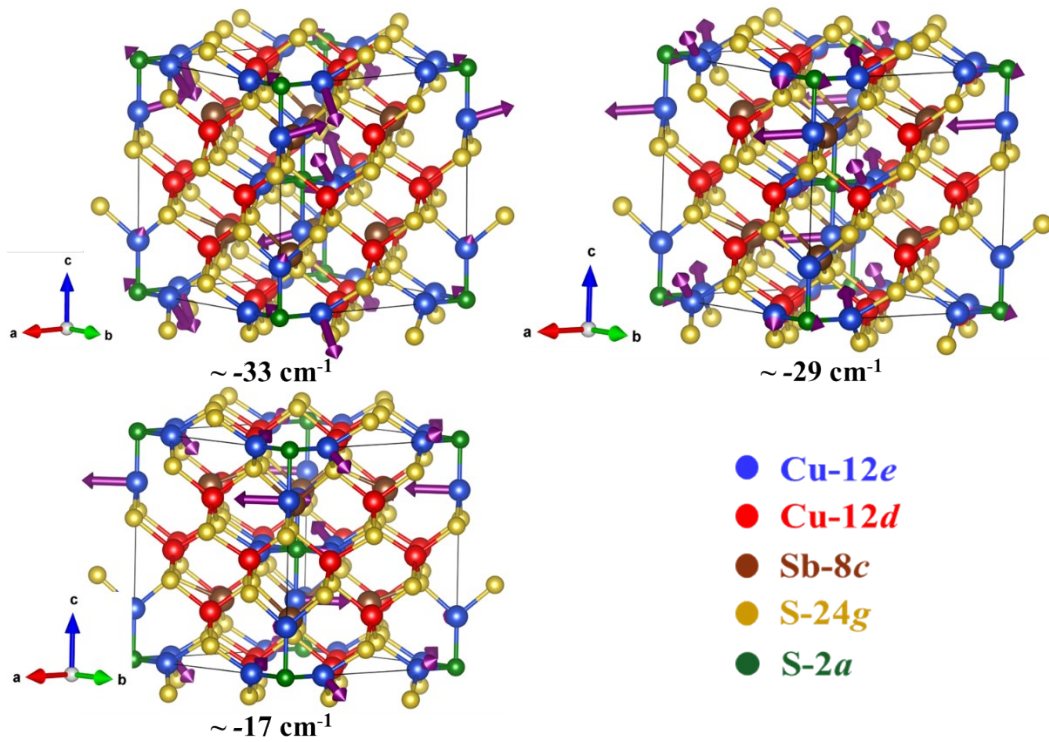

Fig. S6 The eigen vector visualization of imaginary (unstable) vibrational modes, which strongly involves the dominating Cu(12e) atom vibrations (shown in purple arrow).

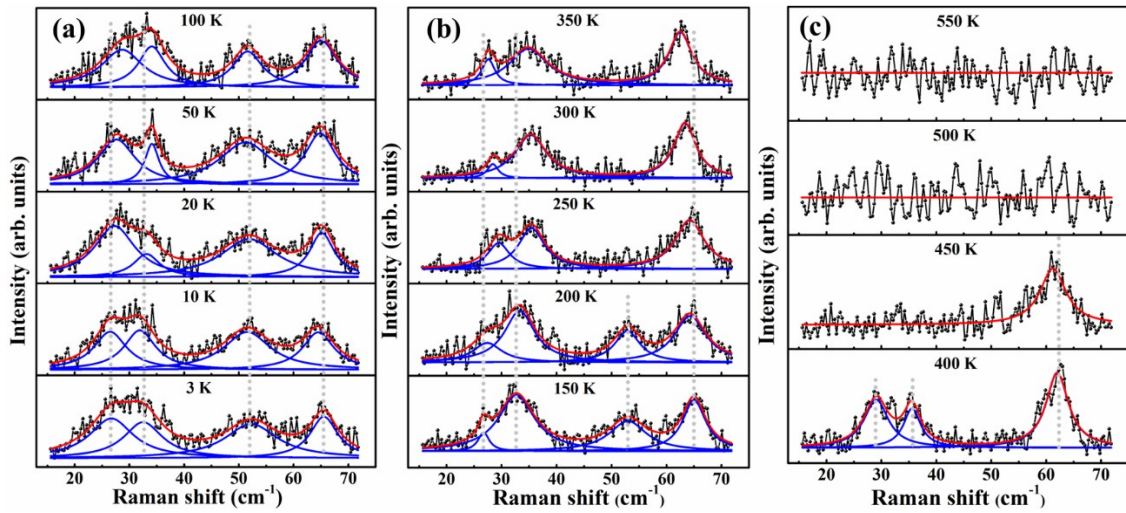

Fig. S7 Temperature dependent (a) 3-100 K, (b) 150-350 K, and (c) 400-550 K in the low-frequency ( $\sim 15-75 \text{ cm}^{-1}$ ) Raman spectra fitting through Lorentzian function.

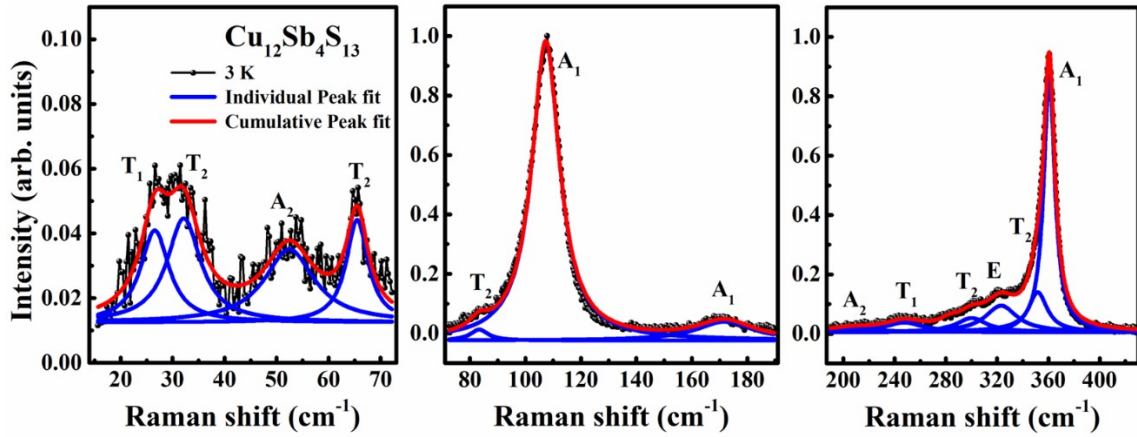

Fig. S8 Lorentzian function fitting of Raman active mode at 3 K, where the low frequency modes are clearly visible for  $\text{Cu}_{12}\text{Sb}_4\text{S}_{13}$ .

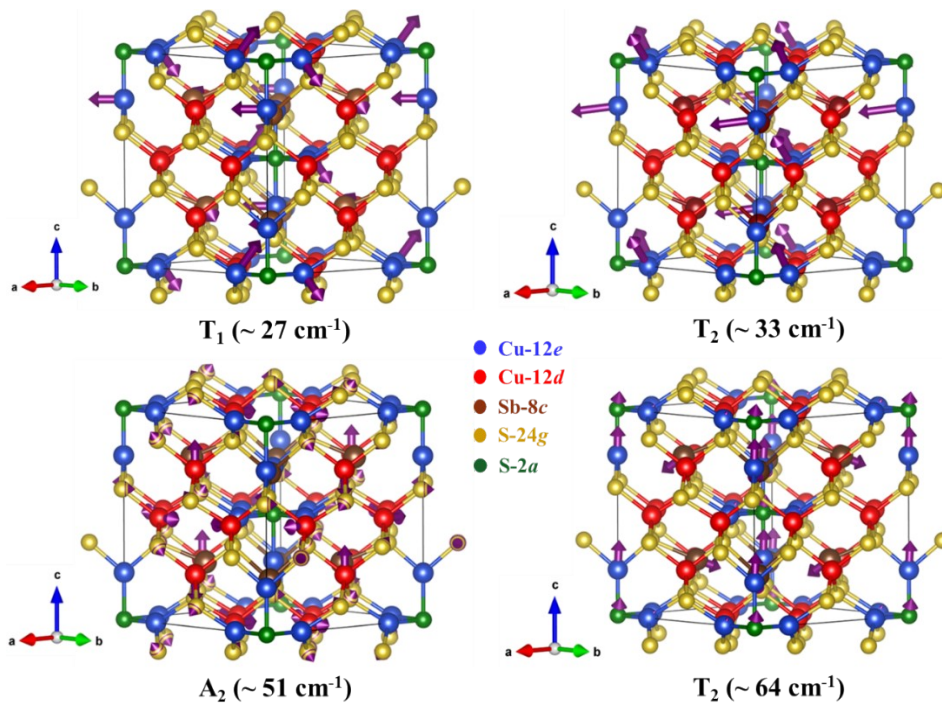

Fig. S9 The eigen vector visualization for low-frequency Raman active modes, which strongly involves the dominating vibrations of Cu(12e) atoms.

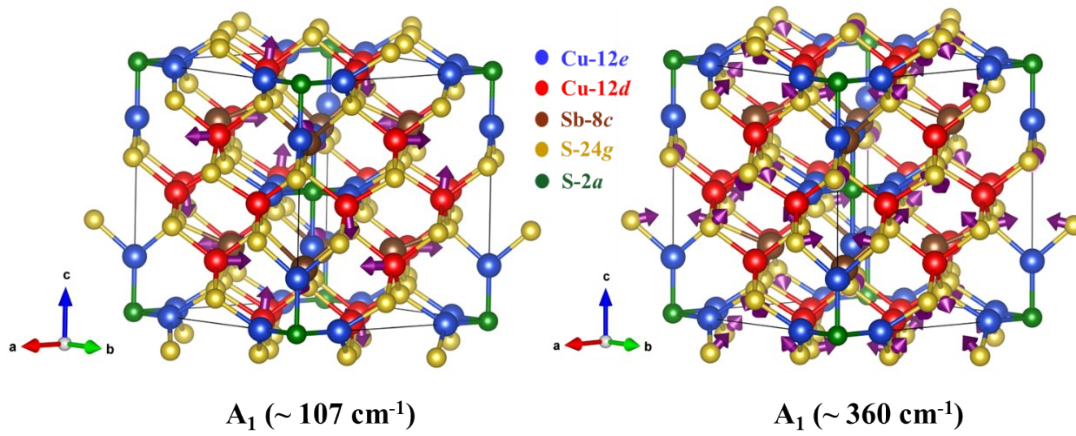

Fig. S10 The eigen vector visualization of highest intensive Raman active modes, which involves the dominating vibrations of Cu(12*d*), Sb(8*c*) and S(24*g*) atoms.

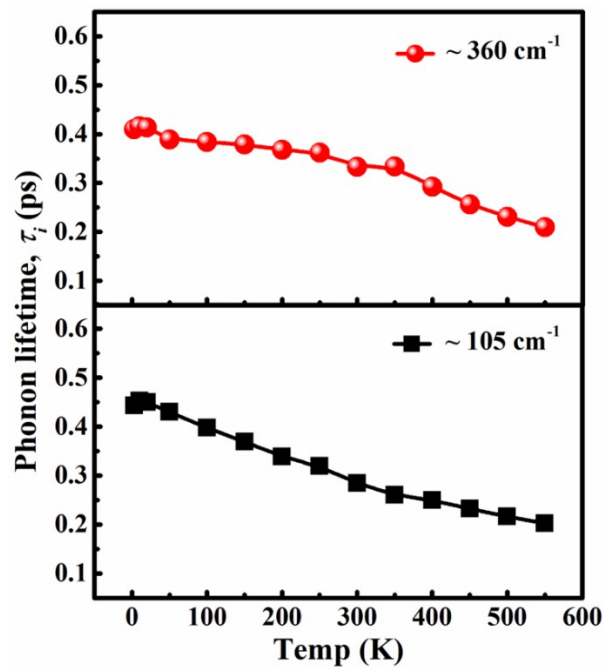

Fig. S11 Temperature dependent (3 – 550 K) phonon lifetime ( $\tau_i$ ) of prominent vibrational mode of  $\text{Cu}_{12}\text{Sb}_4\text{S}_{13}$ .



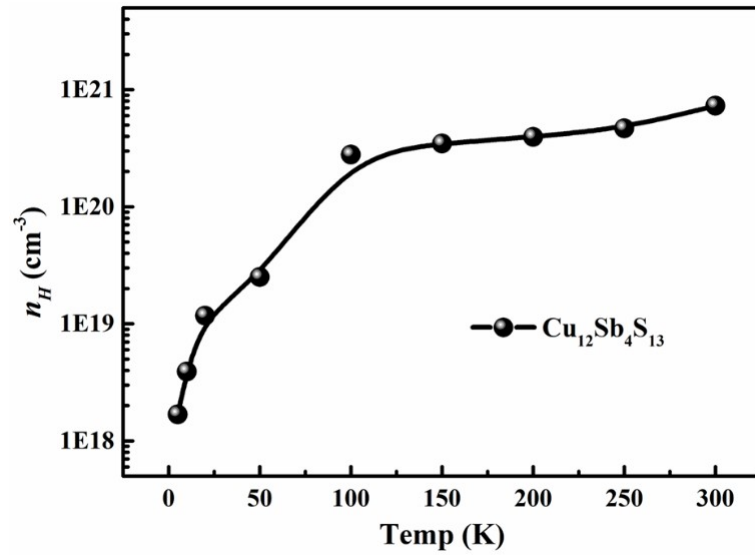

Fig. S12 The temperature dependent carrier concentration ( $n_H$ ), plot for  $\text{Cu}_{12}\text{Sb}_4\text{S}_{13}$ .

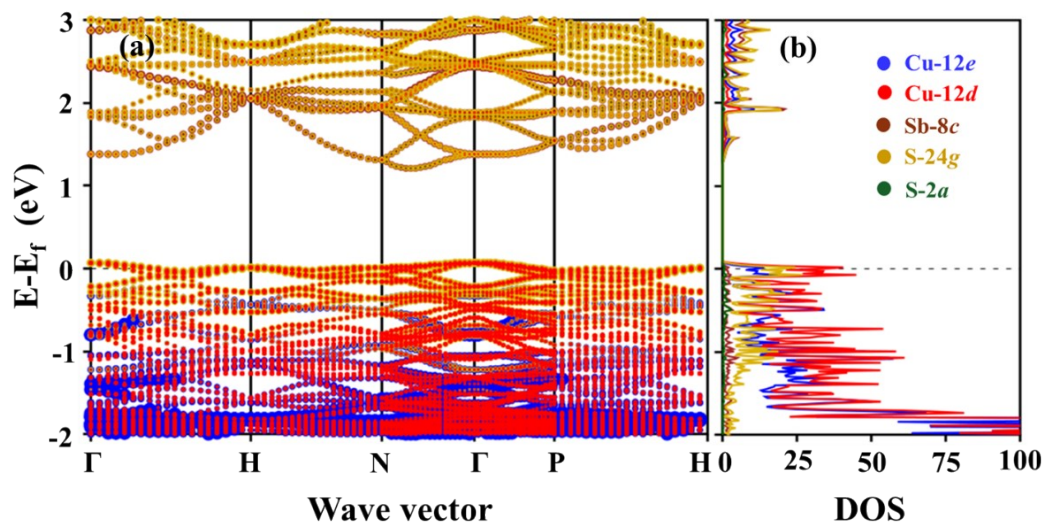

Fig. S13 The (a) electronic band structure and (b) density of states for  $\text{Cu}_{12}\text{Sb}_4\text{S}_{13}$  without  $U$  (Coulombic interaction) term.

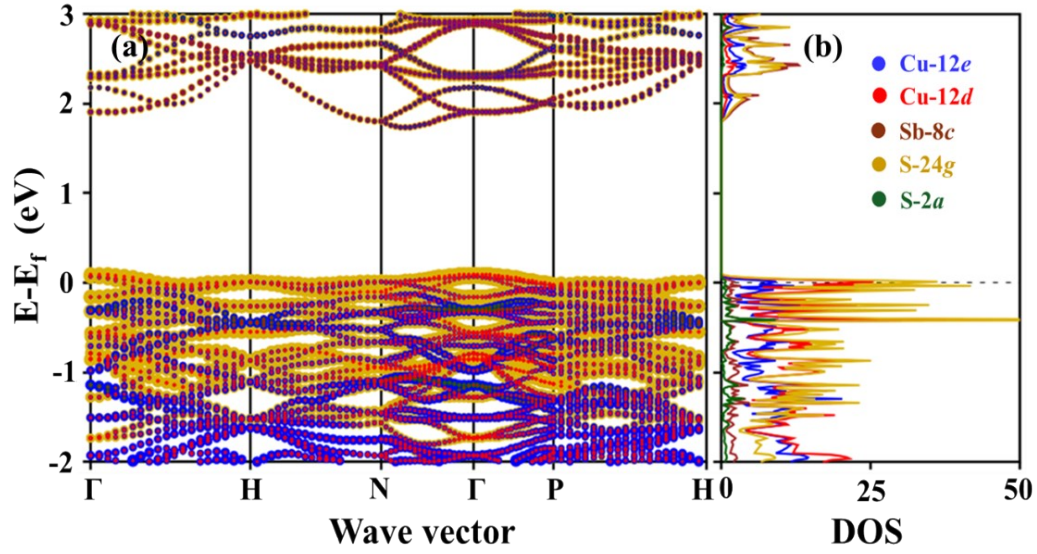

Fig. S14 The (a) electronic band structure and (b) density of states for  $\text{Cu}_{12}\text{Sb}_4\text{S}_{13}$  with  $U$  (Columbic interaction) term.

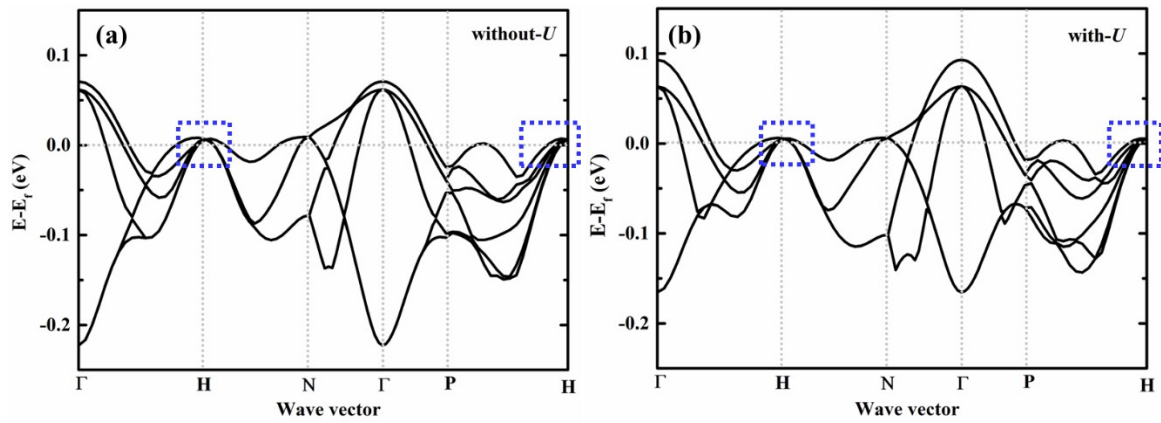

Fig. S15 The convergence of valence band near the Fermi energy ( $E_f$ ) level.

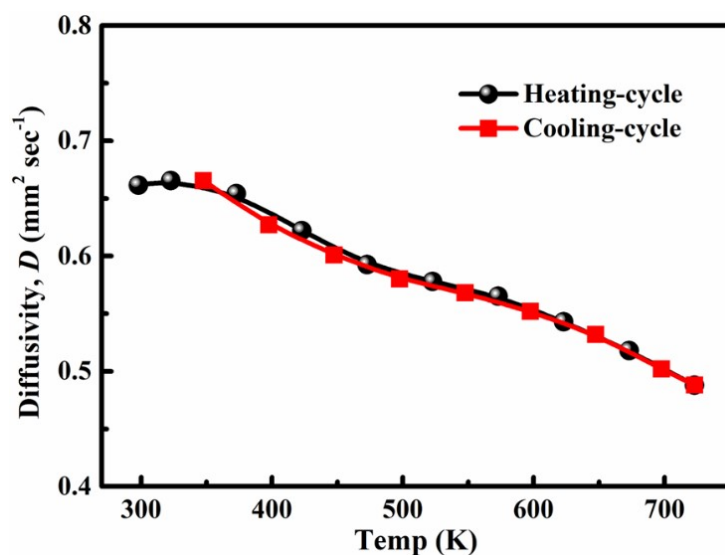

Fig. S16 Temperature dependence diffusivity ( $D$ ) for  $\text{Cu}_{12}\text{Sb}_4\text{S}_{13}$ .

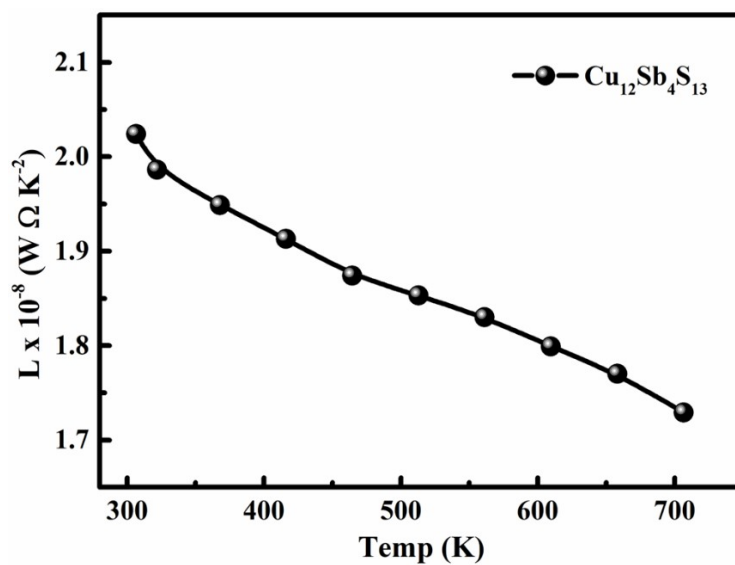

Fig. S17 The estimated Lorenz number ( $L$ ) for  $\text{Cu}_{12}\text{Sb}_4\text{S}_{13}$ .

**Table S1.** The Rietveld refined crystal structure parameters for  $\text{Cu}_{12}\text{Sb}_4\text{S}_{13}$ .

|                                 |         |         |        |       |        |                   |
|---------------------------------|---------|---------|--------|-------|--------|-------------------|
| $a = b = c$<br>( $\text{\AA}$ ) | Cu(12e) | Cu(12d) | Sb(8c) | S(2a) | S(24g) | $V(\text{\AA}^3)$ |
|---------------------------------|---------|---------|--------|-------|--------|-------------------|

|         |                                  |                                    |                                        |                                  |                                        |             |
|---------|----------------------------------|------------------------------------|----------------------------------------|----------------------------------|----------------------------------------|-------------|
| 10.3318 | x = 0.25<br>y = 0.50<br>z = 0.00 | x = 0.2108<br>y = 0.00<br>z = 0.00 | x = 0.2665<br>y = 0.2665<br>z = 0.2665 | x = 0.00<br>y = 0.00<br>z = 0.00 | x = 0.1111<br>y = 0.1111<br>z = 0.3642 | 1102.8<br>9 |
|---------|----------------------------------|------------------------------------|----------------------------------------|----------------------------------|----------------------------------------|-------------|

**Table S2.** The fitting parameters obtained from the heat capacity (1D-3E model) data.

| Fitting parameters<br>(1D-3E) model             | $\text{Cu}_{12}\text{Sb}_4\text{S}_{13}$ |
|-------------------------------------------------|------------------------------------------|
| $\gamma$ (J mol <sup>-1</sup> K <sup>-2</sup> ) | $\sim 0.085 \pm 0.005$                   |
| $\beta$ (J mol <sup>-1</sup> K <sup>-4</sup> )  | $\sim 4.28\text{E-}4 \pm 1.9\text{E-}5$  |
| A (J mol <sup>-1</sup> K <sup>-1</sup> )        | $\sim 11.3 \pm 0.4$                      |
| $\Theta_{E1}$ (K)                               | $\sim 24.7 \pm 0.3$                      |
| B (J mol <sup>-1</sup> K <sup>-1</sup> )        | $\sim 98.0 \pm 3.5$                      |
| $\Theta_{E2}$ (K)                               | $\sim 64.3 \pm 0.8$                      |
| C (J mol <sup>-1</sup> K <sup>-1</sup> )        | $\sim 238.8 \pm 2.5$                     |
| $\Theta_{E3}$ (K)                               | $\sim 123.7 \pm 1.4$                     |
| $R^2$ (Adj. R-Square)                           | $\sim 0.9999$                            |
| $\chi^2$ (Reduced Chi-Square)                   | 1.03E-4                                  |

## References:

1. P. Acharyya, T. Ghosh, K. Pal, K. S. Rana, M. Dutta, D. Swain, M. Etter, A. Soni, U. V. Waghmare and K. Biswas, *Nature Communications*, 2022, **13**, 5053.
2. K. Biswas, J. He, I. D. Blum, C.-I. Wu, T. P. Hogan, D. N. Seidman, V. P. Dravid and M. G. Kanatzidis, *Nature*, 2012, **489**, 414-418.
